# Supplementary material for: Polypyrrole-encapsulated iron tungstate nanocomposites: a versatile platform for multimodal tumor imaging and photothermal therapy
Source: Royal Society of Chemistry journal article supplement (doi:10.1039/c6nr03336a), 2016-01-01
Supplement: c6nr03336a1.pdf [file c6nr03336a1.pdf]

## Electronic Supplementary Information

### **Polypyrrole-encapsulated Iron Tungstate Nanocomposites: A Versatile Platform for Multimodal Tumor Imaging and Photothermal Therapy**

Zhiyin Xiao,<sup>‡ab</sup> Chen Peng,<sup>‡c</sup> Xiaohong Jiang,<sup>d</sup> Yuxuan Peng,<sup>a</sup> Xiaojuan Huang,<sup>a</sup>  
Guoqiang Guan,<sup>a</sup> Wenlong Zhang,<sup>a</sup> Xiaoming Liu,<sup>b</sup> Zongyi Qin<sup>a</sup> and Junqing Hu<sup>\*a</sup>

<sup>a</sup> State Key Laboratory for Modification of Chemical Fibers and Polymer Materials,  
College of Materials Science and Engineering, Donghua University, Shanghai 201620,  
China

<sup>b</sup> College of Biological, Chemical Sciences and Engineering, Jiaying University,  
Jiaying 314001, China

<sup>c</sup> Shanghai Tenth People's Hospital, Tongji University, Shanghai 200072, China

<sup>d</sup> School of Medicine Science, Jiaying University, Jiaying 314001, China

\*Corresponding author. E-mail: [hu.junqing@dhu.edu.cn](mailto:hu.junqing@dhu.edu.cn) (J. Hu);

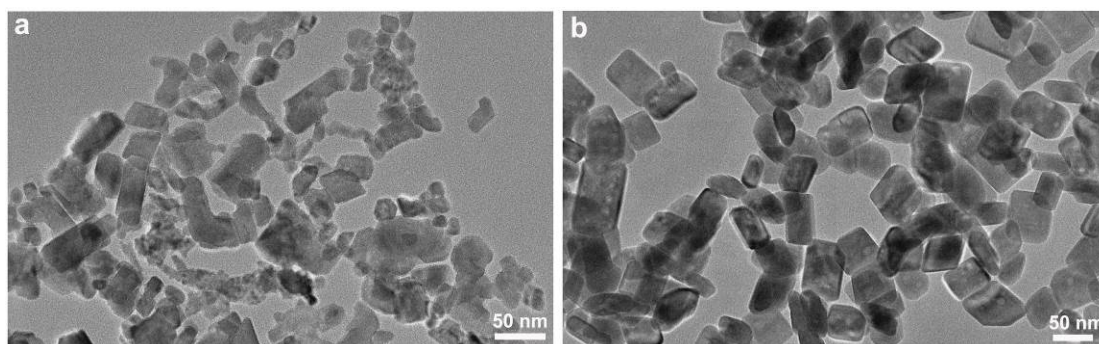

**Figure S1.** TEM images of as-synthesized  $\text{FeWO}_4$  nanoparticles with the absence (a) or presence (b) of PEG-400.

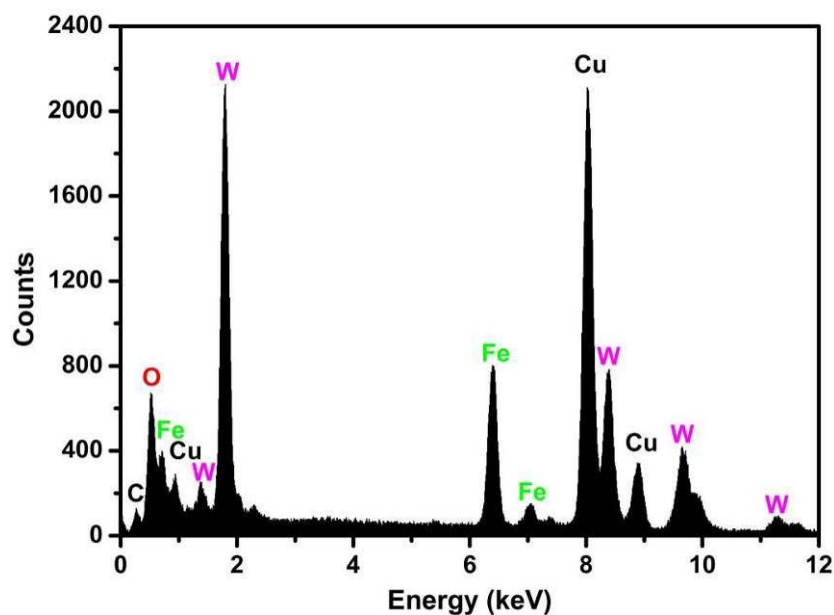

**Figure S2.** EDS spectrum of the as-prepared  $\text{FeWO}_4$  sample.

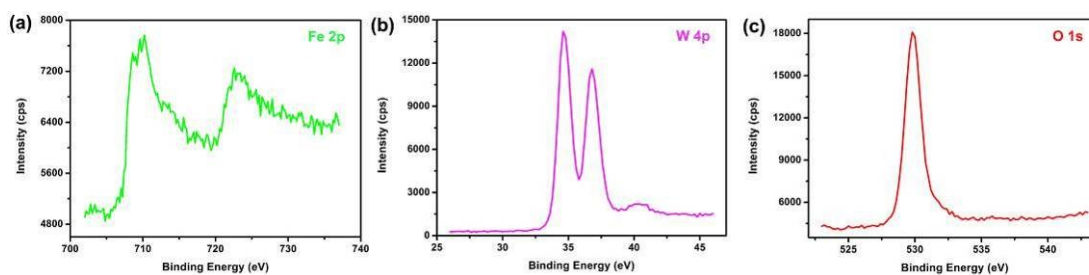

**Figure S3.** XPS spectra of Fe 2p (a), W 4p (b) and O 1s levels (c) of  $\text{FeWO}_4$  nanoparticles.

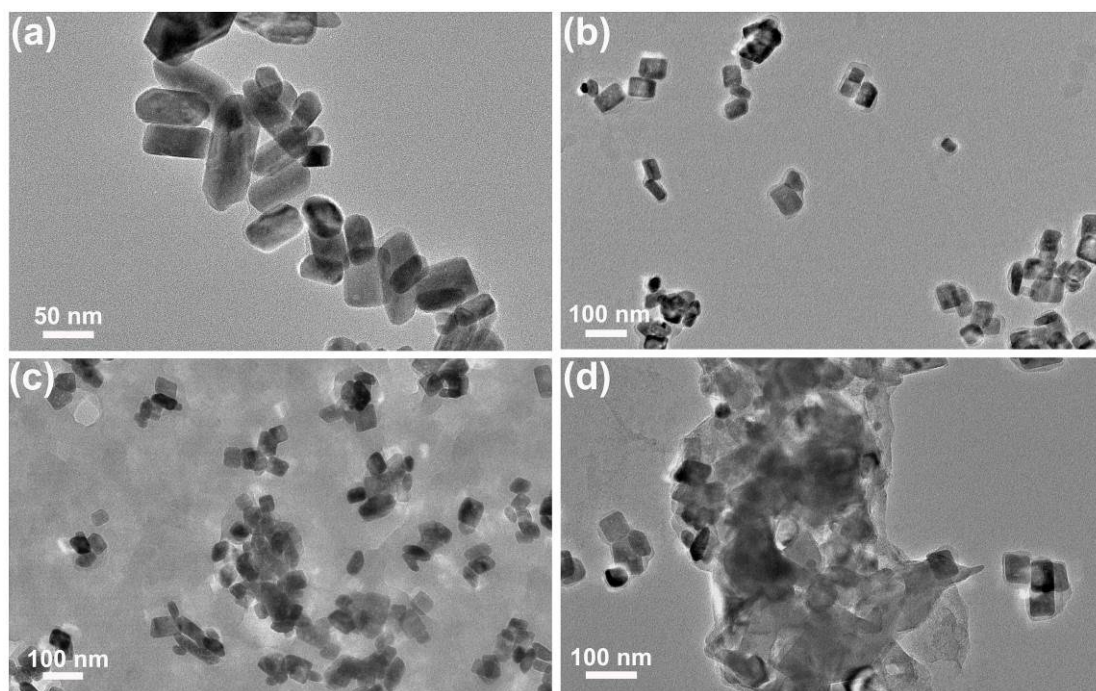

**Figure S4.** TEM images of as-synthesized  $\text{FeWO}_4@\text{PPy}$  nanocomposites under different conditions. Mass ratio of  $\text{FeWO}_4$  : pyrrole = 10 : 1 (a), 2 : 1 (b) and 1 : 5 (c) in a PVA concentration of 4 mg/mL, and 2 : 1 (d) in the PVA concentration of 20 mg/mL.

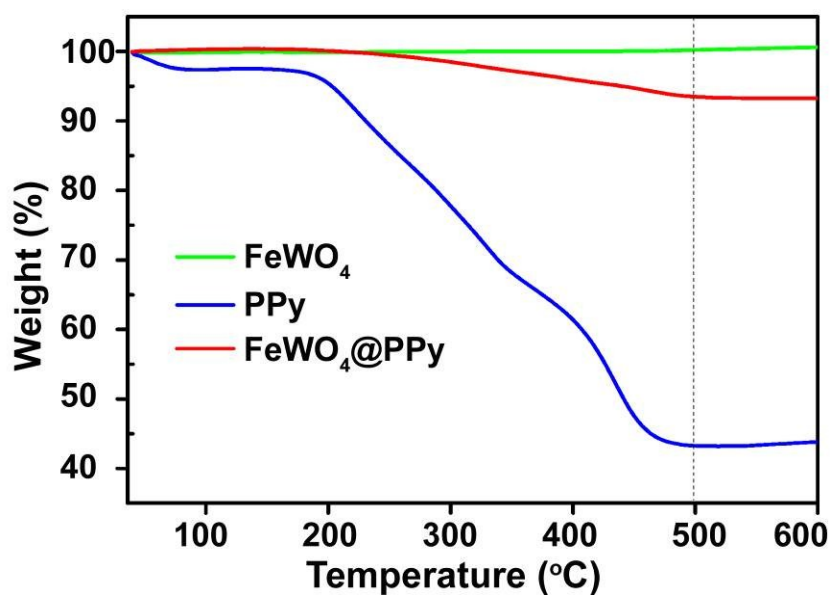

**Figure S5.** Thermal gravimetric analysis curves of  $\text{FeWO}_4$ , PPy and  $\text{FeWO}_4@\text{PPy}$  samples.

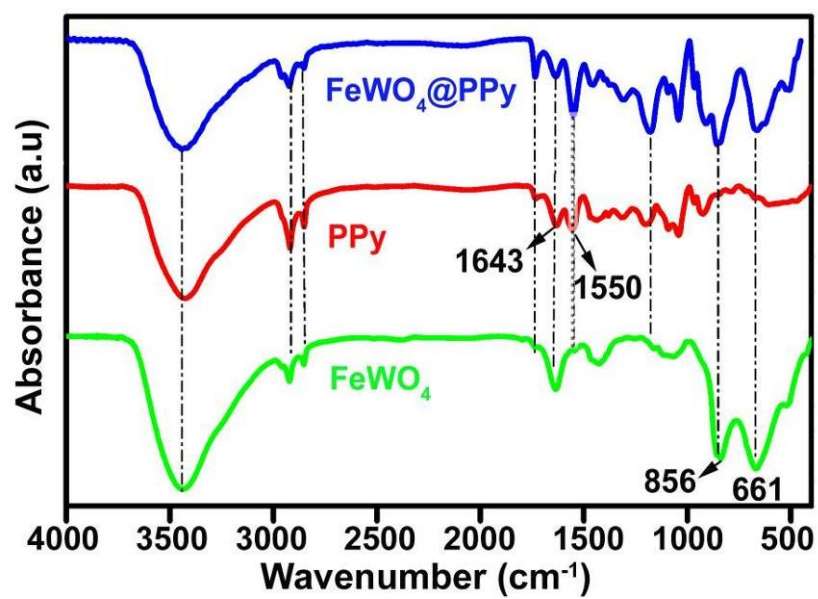

**Figure S6.** FTIR spectra of FeWO<sub>4</sub>, PPy and FeWO<sub>4</sub>@PPy samples.

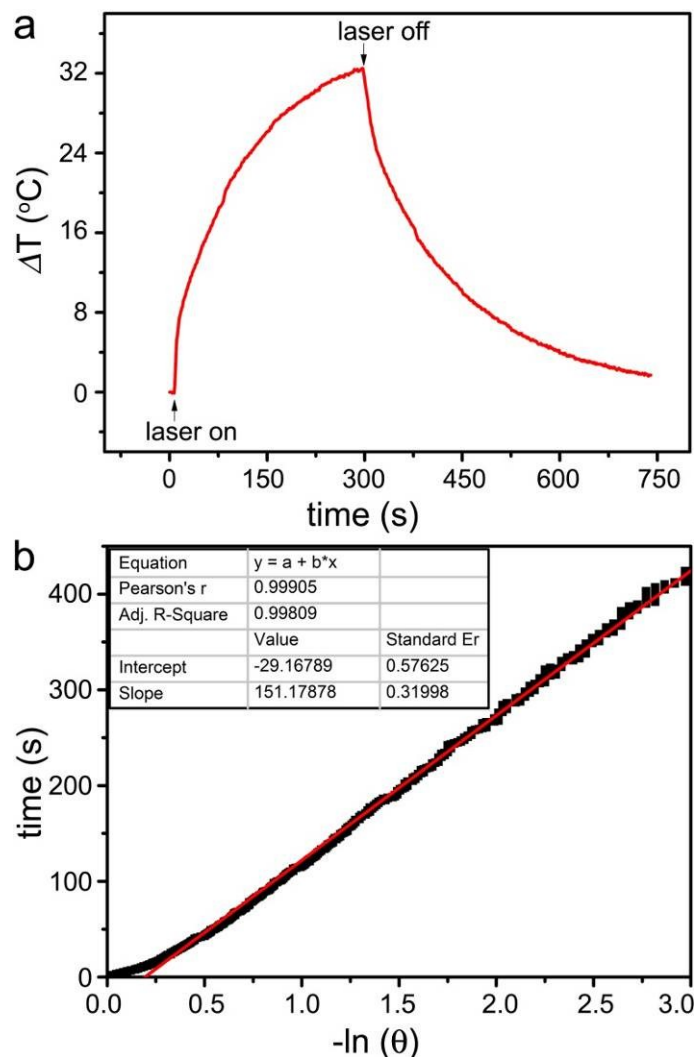

**Figure S7.** (a) Temperature curve of the  $\text{FeWO}_4@\text{PPy}$  nanocomposites with laser on for 5 min and then laser off for cooling. (b) Linear fitting of the time data during the cooling period of (a) versus their corresponding negative natural logarithm of the driving force temperature ( $\theta$ ). To measure the photothermal conversion efficiency ( $\eta_T$ ), 0.25 mL of the  $\text{FeWO}_4@\text{PPy}$  nanocomposites was irradiated by an 808-nm laser for 5 min and then the laser was turned off to let the solution cooling. On-line temperatures were monitored and illustrated in Figure S7a. During the irradiation, the temperature of the  $\text{FeWO}_4@\text{PPy}$  solution raised quickly from ambient temperature with an increment of 32.5 °C. Linear fitting of the cooling time versus negative natural logarithm of the temperature driving force ( $-\ln\theta$ ) gave the time constant ( $\tau_s$ ) of the system as 151.2 s. Heat input of the solvent ( $Q_{\text{dis}}$ ) without the  $\text{FeWO}_4@\text{PPy}$  nanocomposites was also measured independently to be 12.1 mW. Therefore, the value of  $\eta_T$  could be calculated to be 56.1%.

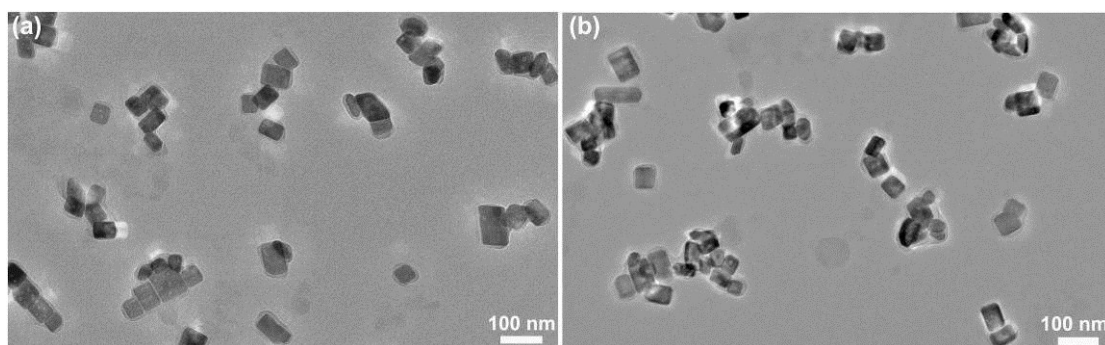

**Figure S8.** Typical TEM images of the  $\text{FeWO}_4@\text{PPy}$  nanocomposites before (a) and after (b) maintaining in solution for one year.

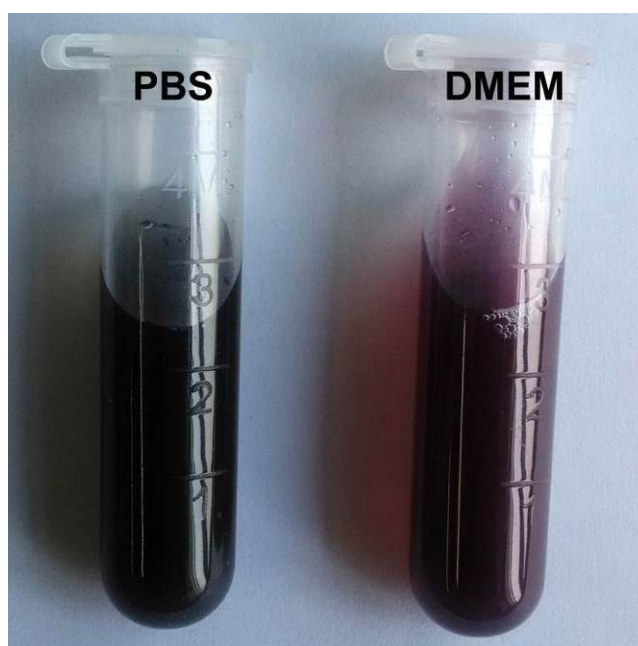

**Figure S9.** Photo of the  $\text{FeWO}_4@\text{PPy}$  nanocomposites dispersed in PBS or DMEM media (400 ppm) after maintaining for two months.



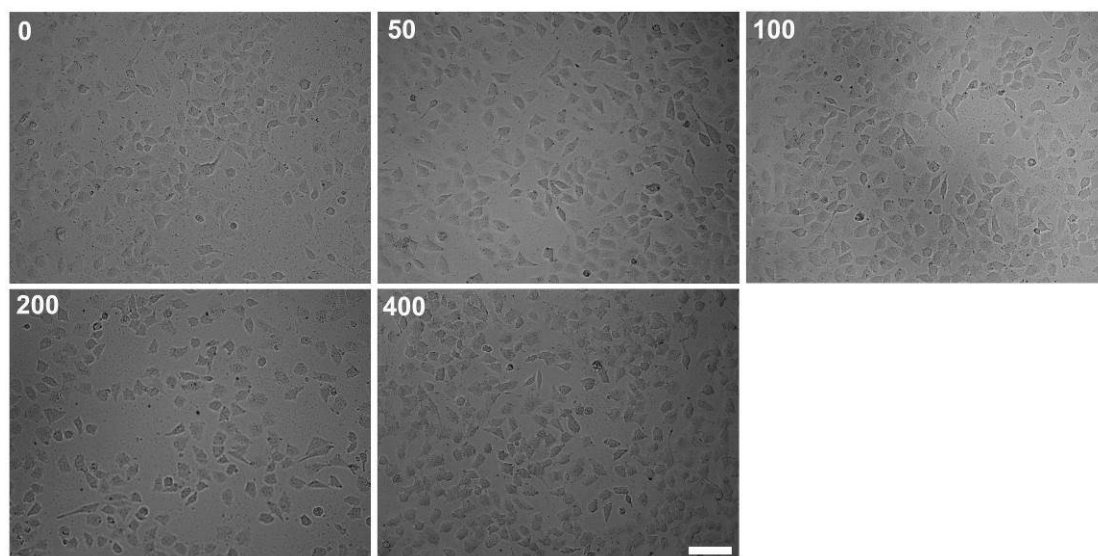

**Figure S10.** Cellular morphologies of HeLa cells after being incubated with different concentrations of the  $\text{FeWO}_4\text{@PPy}$  nanocomposites for 24 h (scale bars = 50  $\mu\text{m}$ ).

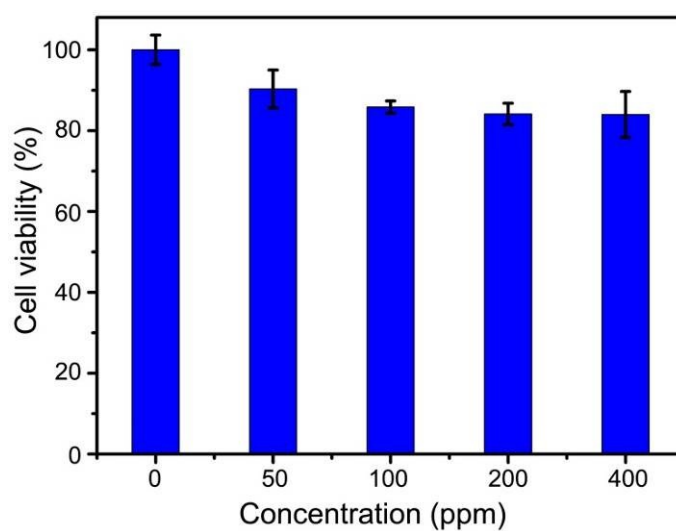

**Figure S11.** Cell viabilities of the BMSCs with treatments of different concentrations of the  $\text{FeWO}_4\text{@PPy}$  nanocomposites determined by a standard MTT assay.

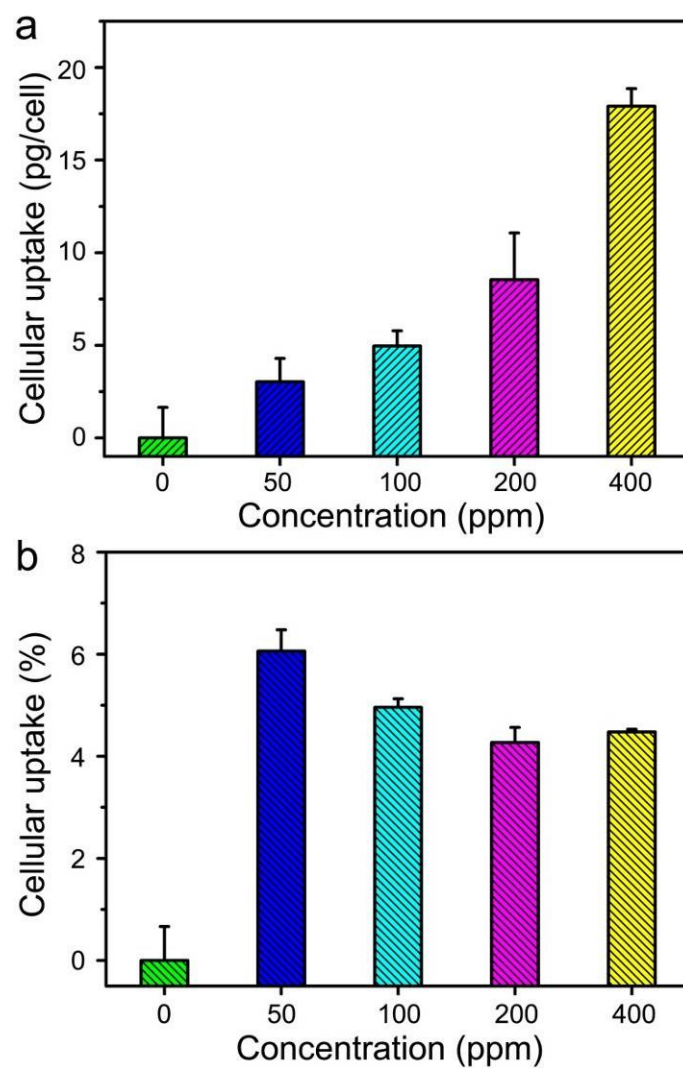

**Figure S12.** (a) Cellular uptake of the FeWO<sub>4</sub>@PPy nanocomposites in HeLa cells and (b) their responding uptake percentage.



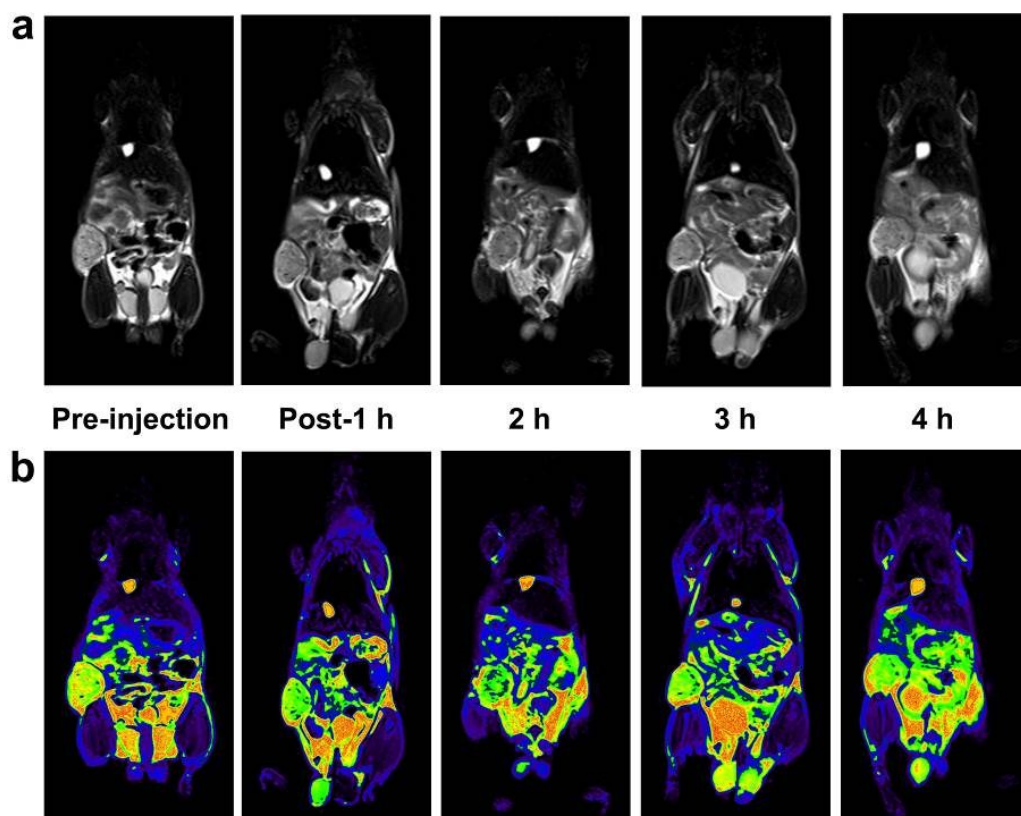

**Figure S13.** (a) Typical MR images of the tumor-bearing mice before and after intravenously injection with 100  $\mu\text{L}$  of  $\text{FeWO}_4@\text{PPy}$  solution (dose: 20 mg/Kg) at different time intervals (0, 1, 2, 3 and 4 h) and (b) their responded weight-colored images.

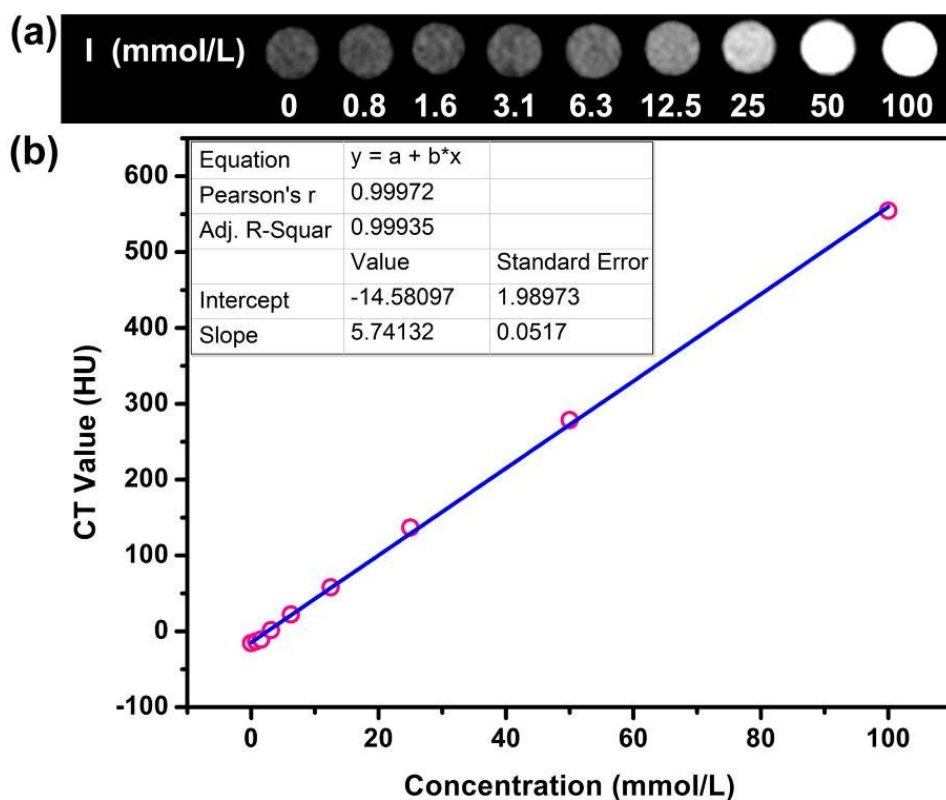

**Figure S14.** X-ray CT imaging test of Iohexol in solution. (a) CT image of Iohexol in solutions with different I concentrations. (b) Linear fitting of the relative CT values versus I concentrations.

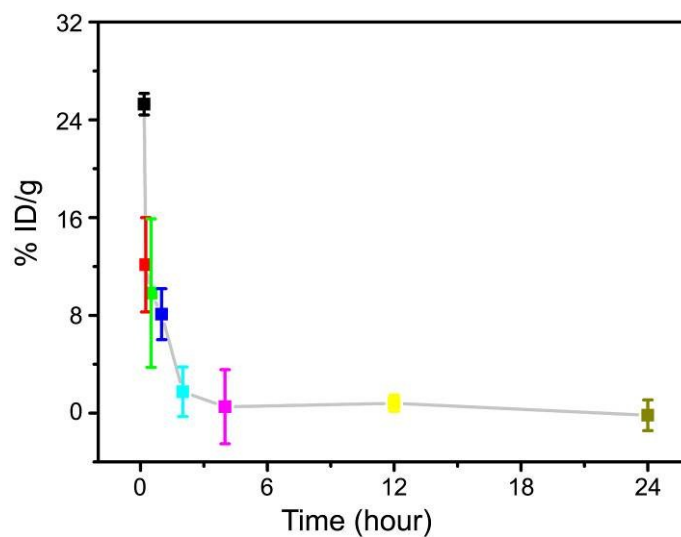

**Figure 15.** Blood circulation of the FeWO<sub>4</sub>@PPy nanocomposites by intravenous administration.

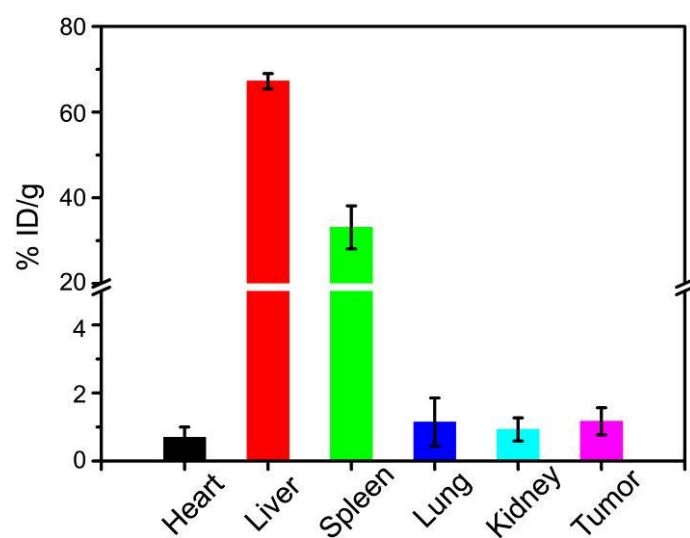

**Figure 16.** Biodistribution of the  $\text{FeWO}_4\text{@PPy}$  nanocomposites in the major organs and tumor of the mice after intravenous injection for 24 h.
